# Supplementary material
Source: MDPI journal article supplement (https://www.mdpi.com/2571-8789/6/1/10)
Supplement: s1 [file s1]

# Effect of Pyroligneous Acid on the Microbial Community Composition and Plant Growth-Promoting Bacteria (PGPB) in Soils

Anithadevi Kenday Sivaram <sup>1</sup>, Logeshwaran Panneerselvam <sup>1,2</sup>, Kannappar Mukunthan <sup>3</sup> and Mallavarapu Megharaj <sup>1,2,\*</sup>

<sup>1</sup> Global Centre for Environmental Remediation, College of Engineering, Science and Environment, The University of Newcastle (UoN), Callaghan, NSW 2308, Australia; Anitha.KendaySivaram@newcastle.edu.au (A.K.S.); logeshwaran.panneerselvam@newcastle.edu.au (L.P.)

<sup>2</sup> Cooperative Research Centre for Contamination Assessment and Remediation of the Environments, The University of Newcastle (UoN), Callaghan, NSW 2308, Australia

<sup>3</sup> BioCarbon Proprietary Limited, Boola Place, Cromer, NSW 2099, Australia; kannappar.mukunthan@gmail.com

\* Correspondence: megh.mallavarapu@newcastle.edu.au; Tel.: +61-411-126-857

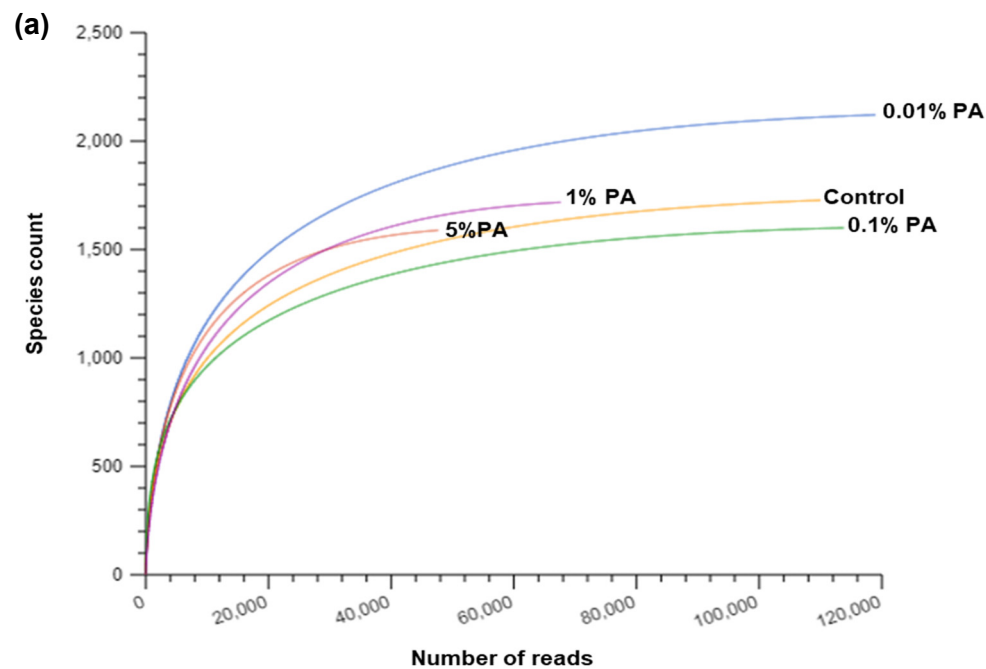

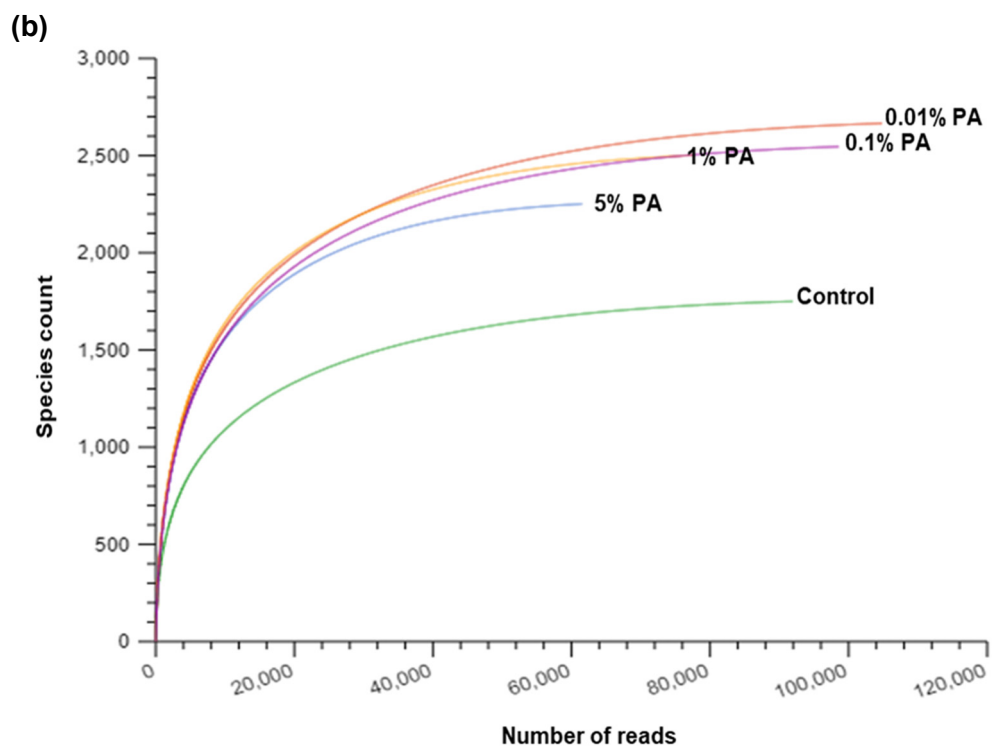

**Figure S1.** Rarefaction curve of bacterial 16SrRNA genes from (a) soil A spiked with and without PA and (b) soil B spiked with and without PA.
